# Supplementary material
Source: PubMed Central journal article supplement (PMC5475252)
Supplement: mmc1.pdf [file mmc1.pdf]

YMTHE, Volume 25

## **Supplemental Information**

### **CXCR5-Overexpressing Mesenchymal Stromal Cells Exhibit Enhanced Homing and Can Decrease Contact Hypersensitivity**

**Xiaoran Zhang, Weijun Huang, Xiaoyong Chen, Yufan Lian, Jiancheng Wang, Chuang  
Cai, Li Huang, Tao Wang, Jie Ren, and Andy Peng Xiang**

## Supplementary material

### Figure S1. Lentiviral transduction, and experiments showing that forced expression of CXCR5 does not alter the characteristics of MSCs *in vitro*.

(a and b) Lentivirus were produced by virus package technique and condensed by ultracentrifugation. MSC<sup>CXCR5</sup> and MSC<sup>eGFP</sup> were cultured continuously after fluorescence activated cell sorting. The morphologies of MSC<sup>eGFP</sup> and MSC<sup>CXCR5</sup> were assessed by a bright field microscopy, and green fluorescence was monitored under fluorescence microscopy.

(c and d) The MSCs surface expression levels of CD29, CD44, CD73, CD90, CD105, CD166, CD34, and CD45, were analyzed by flow cytometry.

(e and f) Oil red O, Alizarin red S, and Toluidine blue O staining were used to assess the adipogenic, osteogenic, and chondrogenic differentiations, respectively, of transfected MSCs. Scale bar=200  $\mu$ m.

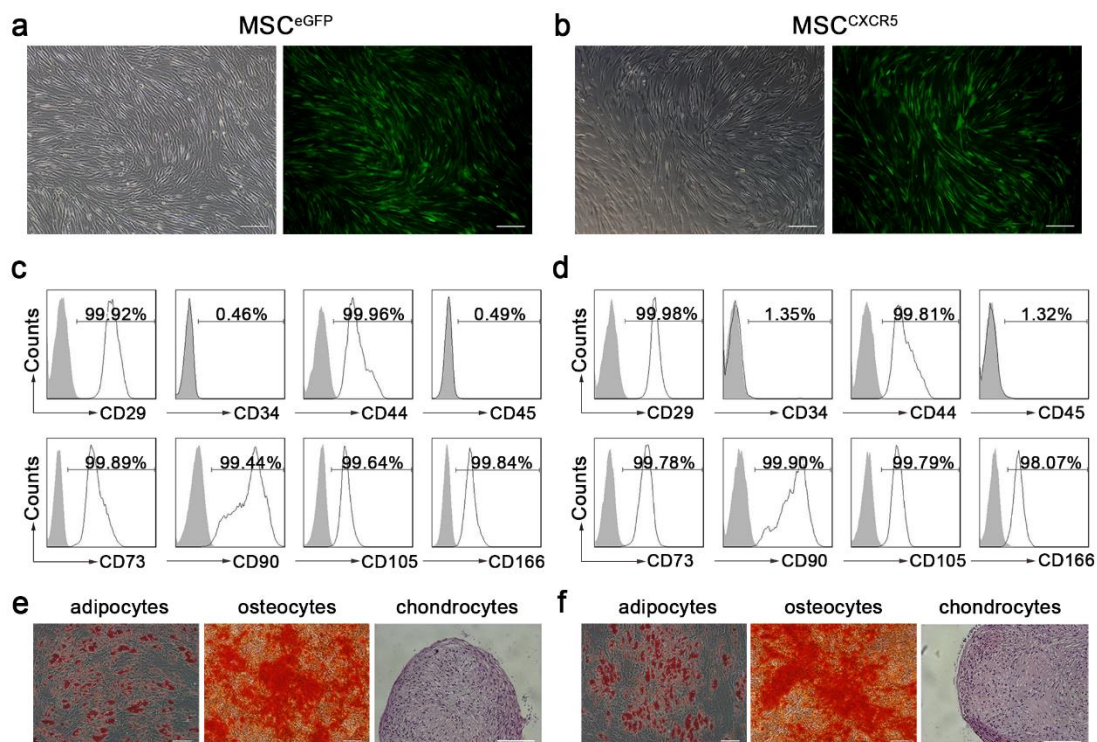

**Figure S2. MSC<sup>CXCR5</sup> gain the ability to migrate towards mCXCL13 and hCXCL13 *in vitro*.**

(a) Cytoskeleton arrangement pattern of MSC<sup>CXCR5</sup> in culture ( I ) and reorganization after migration ( II ), as examined by fluorescence microscopy. Actin filaments were exhibited with Phalloidin ( red ), and cell nucleus were exhibited with DAPI ( blue ).  
bar=100  $\mu$ m.

(b) Relative number of MSC<sup>CXCR5</sup> with lamellipodia in culture or after migration induced with mCXCL13; \*\*\* $P < 0.001$ .

(c) Pull-down assay assessing Rac-1 activation in MSC<sup>CXCR5</sup> cultured with and without mCXCL13. Representative blots and histogram showed the up-regulation of active Rac 1 induced by mCXCL13.

(d) Cytoskeleton arrangement pattern of MSC<sup>CXCR5</sup> in culture ( I ) and reorganization after migration ( II ), as examined by fluorescence microscopy. Actin filaments were exhibited with Phalloidin ( red ), and cell nucleus were exhibited with DAPI ( blue ).  
bar=100  $\mu$ m.

(e) Relative number of MSC<sup>CXCR5</sup> with lamellipodia in culture or after migration induced with hCXCL13; \*\*\* $P < 0.001$ .

(f) Pull-down assay assessing Rac-1 activation in MSC<sup>CXCR5</sup> cultured with and without hCXCL13. Representative blots and histogram showed the up-regulation of active Rac 1 induced by hCXCL13.

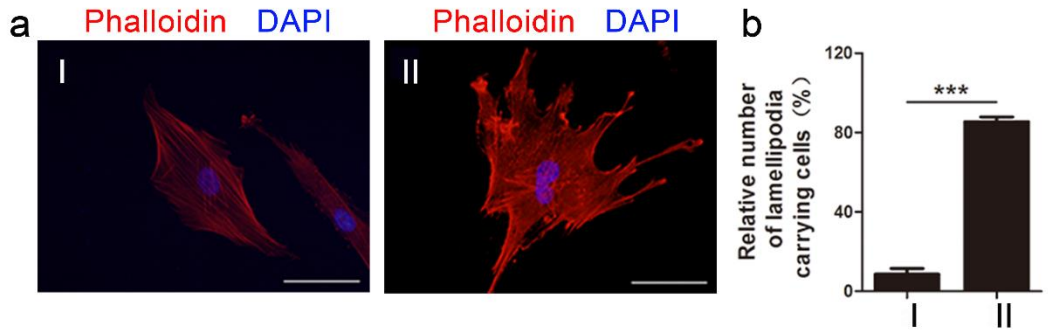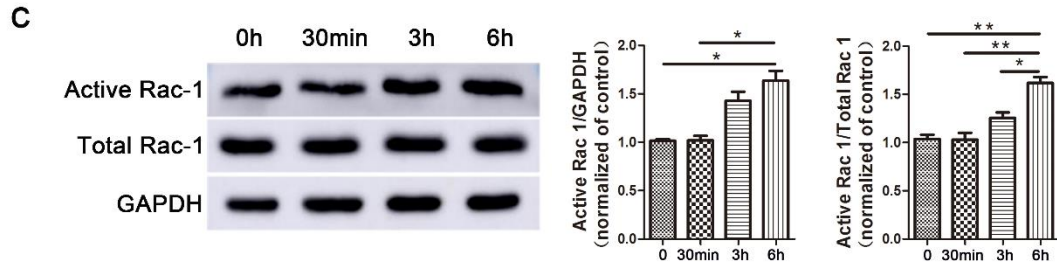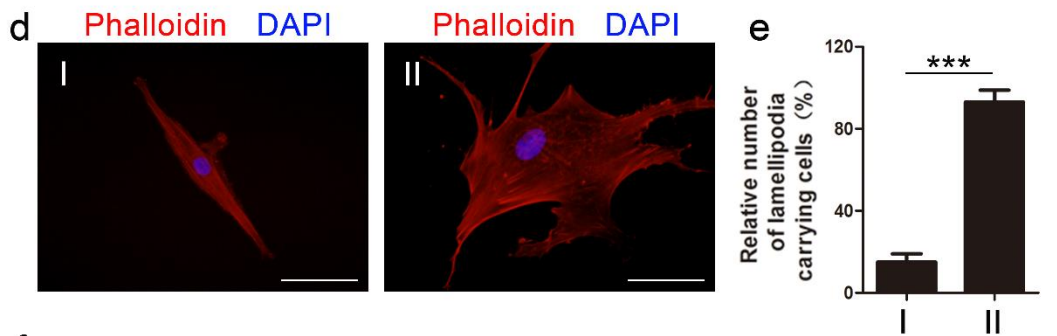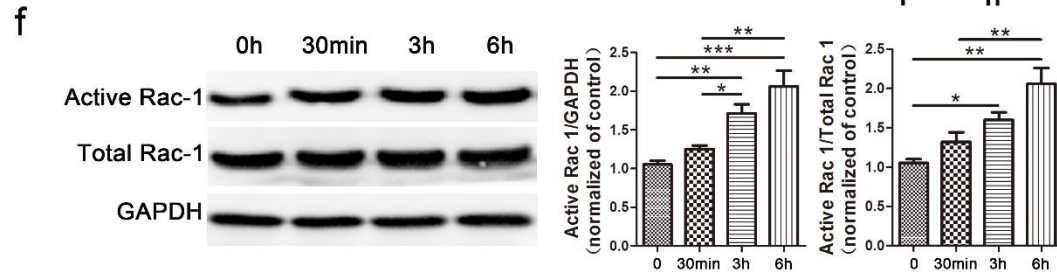

**Figure S3. Quantitative real-time PCR assay for identifying human DNA.**

(a) Serial dilutions of genomic human DNA (hDNA) concentrations and comparable cell number with correspondingly Ct values were presented in tabular format.

(b) Standard curves derived from the log<sub>10</sub> cell number (human MSCs) were plotted against the mean Ct values.

(c) Probable cell number of MSC<sup>eGFP</sup> or MSC<sup>CXCR5</sup> in 1 μg genomic DNA of diseased ears. *n* = 6 mice per group from three independent experiments.

(d) Serial dilutions of genomic human cDNA concentrations and comparable cell number with correspondingly Ct values were presented in tabular format.

(e) Standard curves derived from the log<sub>10</sub> cell number (human MSCs) were plotted against the mean Ct values.

(f) Probable cell number of MSC<sup>eGFP</sup> or MSC<sup>CXCR5</sup> in 1 μg cDNA of diseased ears. *n* = 6 mice per group from three independent experiments.

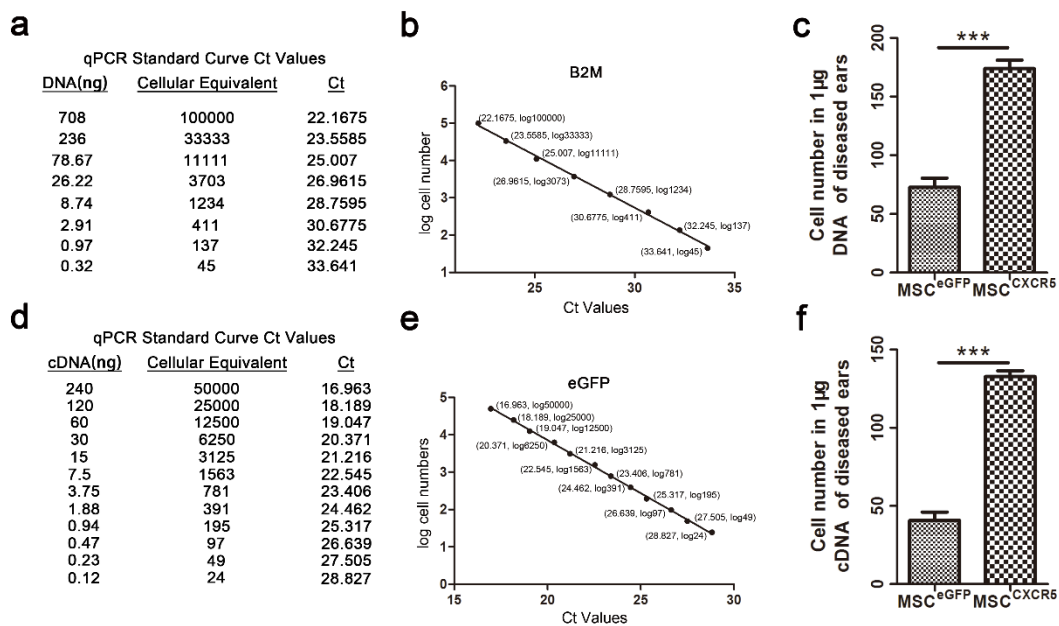

**Figure S4. MSC<sup>eGFP</sup> and MSC<sup>CXCR5</sup> with T cells in the inflamed ears.**

(a) Sections were obtained from challenged ears one day after injections and stained with anti-mouse CD3 and anti-mouse TCR  $\beta$  Chain. eGFP expressing MSC<sup>eGFP</sup> and MSC<sup>CXCR5</sup> cells were observed in challenged ears.  $n = 6$  mice per group from three independent experiments and the pictures were performed in at least six sections per tissue. CD3, white; mTCR, red; eGFP, green; DAPI, blue; Bar=100 $\mu$ m.

(b) Three days after injections, sections were obtained from challenged ears and stained with anti-mouse CD3 and anti-mouse CD4 or anti-mouse CD8. eGFP expressing MSC<sup>eGFP</sup> and MSC<sup>CXCR5</sup> cells were observed in challenged ears.  $n = 6$  mice per group from three independent experiments and the pictures were performed in at least six sections per tissue. CD3, white; CD4, violet; CD8, red; eGFP, green; DAPI, blue; Bar=100 $\mu$ m.

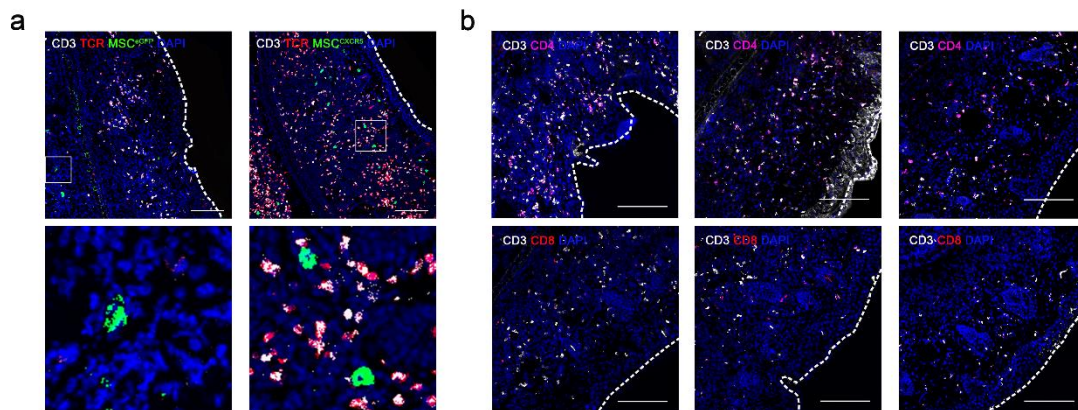

**Figure S5. Construction of plasmids.**

(a-c) Construction of pLV/Puro-EF1 $\alpha$ -CXCR5-IRES-eGFP. The CXCR5-encoding plasmid was constructed using the multisite gateway technology.

**a** PCR amplification

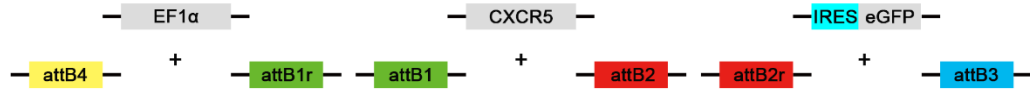

**b**

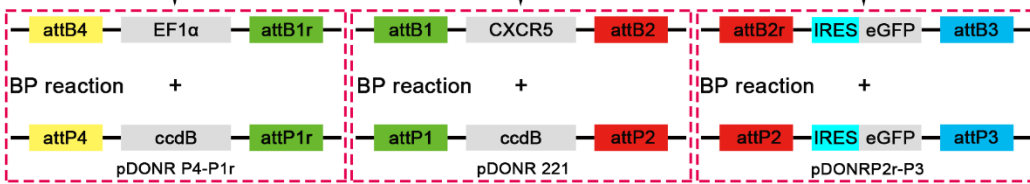

**c**

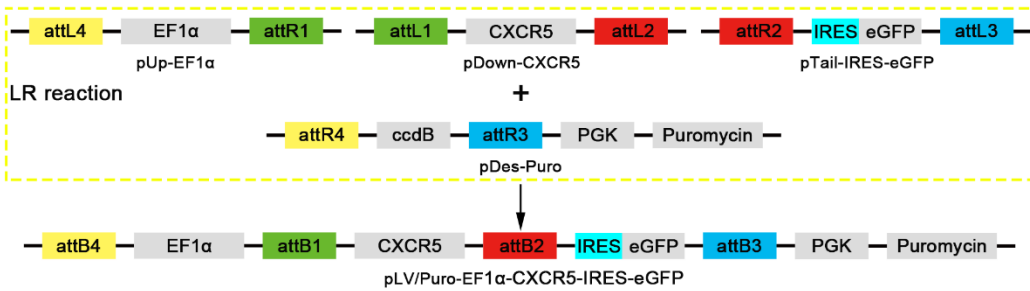

**Figure S6. Construction of plasmids.**

(a-c) Construction of pLV/Puro-EF1 $\alpha$ -eGFP. The control plasmid which only express eGFP was constructed by multisite gateway technology.

**a PCR amplification**

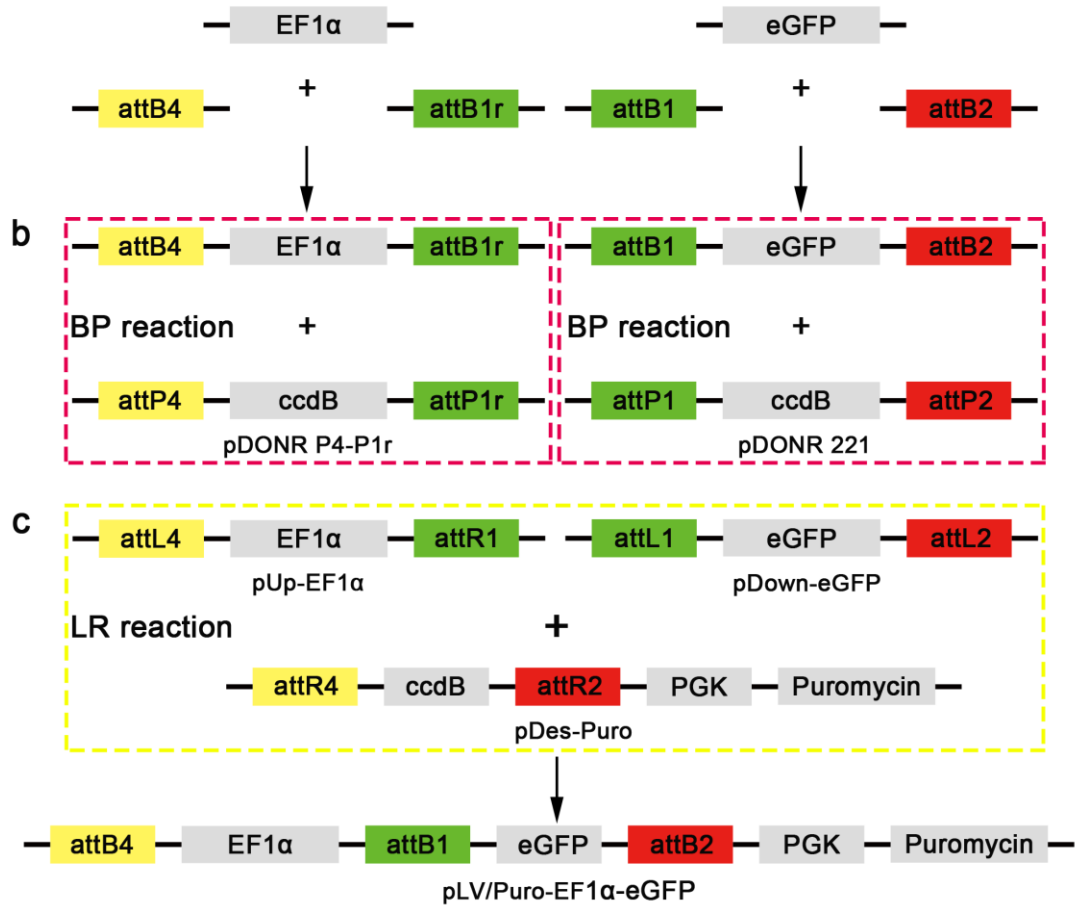



**Figure S7. The transduction efficiency of MSC<sup>CXCR5</sup> and MSC<sup>eGFP</sup>.**

(a) Three days after transduction, eGFP of MSC<sup>CXCR5</sup> and MSC<sup>eGFP</sup> were detected by flow cytometric analyses. MSC<sup>CXCR5</sup> and MSC<sup>eGFP</sup> were purified by fluorescence activated cell sorting (Influx, BD). The results are representative of three experiments.

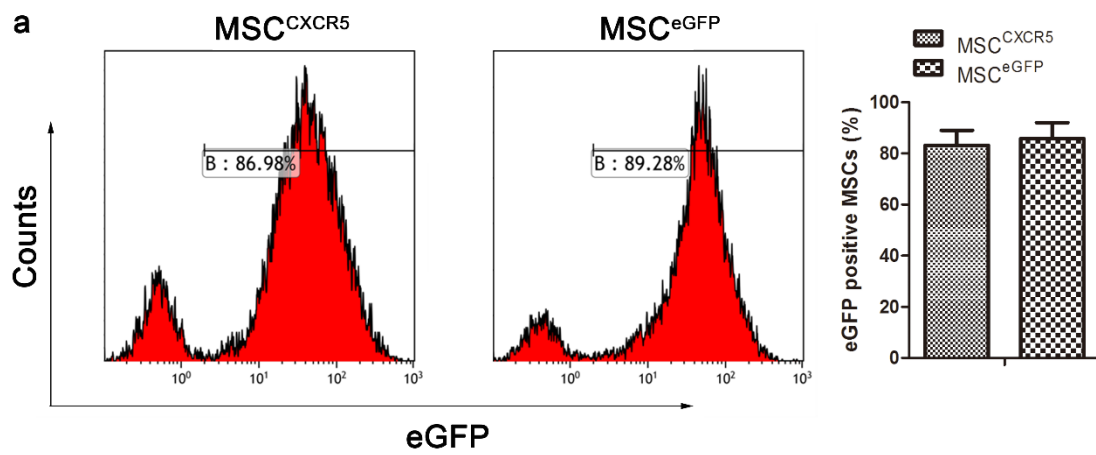

**Table S1. Sequence of Specific Primers Used for q-PCR Analysis:****Human:**

| <b>Genes</b> | <b>Forward Sequence</b> | <b>Reverse Sequence</b> |
|--------------|-------------------------|-------------------------|
| GAPDH        | GAAGGTGAAGGTCGGAGTC     | GAAGATGGTGATGGGATTTC    |
| CCR1         | TGCATCCCCATAGTCAAACCTC  | CAGAAAGCCCCAGAAACAAA    |
| CCR2         | GACTTCTTCACCGCTCTCGT    | CTGAGACAAGCCACAAGCTG    |
| CCR3         | CAACTCAGCAGTGAAATGTGC   | TCTTCTTGTGCTTATCCGGG    |
| CCR4         | CTTTCATCGAGGGTGGTGTC    | CACAGACCTTCCTCAGAGCC    |
| CCR5         | CTGCGATTTGCTTCACATTG    | TGAGACATCCGTTCCCCTAC    |
| CCR6         | AAATTCATTGATTCCCCGCT    | TGAAGGGAGTGGATCAGAGC    |
| CCR7         | TCTCCGATGTAATCGTCCGT    | CAGCCTTCCTGTGTGGTTTT    |
| CCR8         | TCACAGGGGCTTGAGAAGAT    | CCTCCAGAACAAAGGCTGTC    |
| CCR9         | AGGGCTTGTGAAGTCTGTGG    | CAGAGAGCAACCCAGCTCTT    |
| CCR10        | GTCAGGGAGACACTGGGTTG    | GACGGAGGCCACAGAGC       |
| CXCR1        | GGCATGCCAGTGAAATTTAG    | TACTGTTGGACACACCTGGC    |
| CXCR2        | TCTTCAAAGCTGTCACTCTCCA  | AGCAGGTCACAGCTGCTCTT    |
| CXCR3        | CTCGGCGTCATTTAGCACTT    | AACCACAAGCACCAAAGCAG    |
| CXCR4        | CTTGTCCGTCATGCTTCTCA    | GAACCCTGTTTCCGTGAAGA    |
| CXCR5        | CCTTGAAGGAGGCCATGAG     | TAACGCTGGAAATGGACCTC    |
| CXCR6        | GCAGGAAGTCTTGATGCTCC    | TGAGCAAGCTCATCTCTGGA    |
| CXCR7        | CAGATCCATCGTTCTGAGGC    | GCAGAGCTCACAGTTGTTGC    |
| B2M          | GGTTGCTCCACAGGTAGCTC    | TTTCCCCCAAATTCTAAGCA    |

|      |                      |                        |
|------|----------------------|------------------------|
| eGFP | AGGACGACGGCAACTACAAG | AAGTTCACCTTGATGCCGTTTC |
|------|----------------------|------------------------|

**Mouse:**

| <b>Genes</b>  | <b>Forward Sequence</b> | <b>Reverse Sequence</b> |
|---------------|-------------------------|-------------------------|
| GAPDH         | TCAATGAAGGGGTCGTTGAT    | CGTCCCGTAGACAAAATGGT    |
| IL-4          | GGTGTTCTTCGTTGCTGTGA    | TCTCGAATGTACCAGGAGCC    |
| IL-6          | TGGTACTCCAGAAGACCAGAGG  | AACGATGATGCACTTGCAGA    |
| IL-10         | AGACACCTTGGTCTTGGAGC    | TTTGAATTCCCTGGGTGAGA    |
| IL-17         | AGAATTCATGTGGTGGTCCAG   | ACTACCTCAACCGTTCCACG    |
| TNF- $\alpha$ | GGTCTGGGCCATAGAACTGA    | CAGCCTCTTCTCATTCTGC     |
| IFN- $\gamma$ | TGAGCTCATTGAATGCTTGG    | AGGCCATCAGCAACAACATA    |
| CCL2          | TCTCCAGCCTACTCATTGGG    | AGGTCCCTGTCATGCTTCTG    |
| CCL8          | CTCGTAGCTTTTCAGCACCC    | TTCTTTGCCTGCTGCTCATA    |
| CCL17         | ATCCCTGGAACACTCCACTG    | TGCTTCTGGGGACTTTTCTG    |
| CCL19         | ACATCGTGAAAGCCTTCCGCTA  | TCCTTCTGGTGCTGTTGCCTT   |
| CCL21         | ACCAAGTTTAGGCTGTCCCAT   | ACTTAGAGGTTCCCCGGTTC    |
| CCL27         | GGTACAGTCCCTTGGAGCCT    | GACTGTCACCTCCAGGCTGT    |
| CXCL2         | CATCAGGTACGATCCAGGCT    | CCTGGTTCAGAAAATCATCCA   |
| CXCL10        | CTTCCCTATGGCCCTCATTC    | AAGTGCTGCCGTCATTTTCT    |
| CXCL12        | AGGGCACAGTTTGGAGTGTT    | GCGCTCTGCATCAGTGAC      |
| CXCL13        | ATTCTGGAAGCCCATTACACA   | TTTGGCACGAGGATTCACAC    |

**Table S2. Primary Antibodies Used for Immunofluorescence Staining**

| <b>Antigen</b>         | <b>Host</b> | <b>Source</b>       | <b>Dilution</b> | <b>Clone</b> |
|------------------------|-------------|---------------------|-----------------|--------------|
| eGFP                   | Rabbit      | Bioss<br>Antibodies | 1:50            | bs-2194R     |
| Mouse CXCL13/BLC/BCA-1 | Goat        | R&D system          | 1:50            | AF470        |
| CD4                    | Rat-AF647   | Biolegend           | 1:50            | 100424       |
|                        | Rat-AF594   |                     |                 | 100446       |
| CD8a                   | Rat-AF594   | Biolegend           | 1:50            | 100758       |
| CD3                    | Rat-AF647   | Biolegend           | 1:50            | 100209       |
| TCR $\beta$ Chain      | Armenian    | BD                  | 1:50            | 561081       |
|                        | Hamster     | biosciences         |                 |              |

**Table S3. Secondary Reagents Used for Immunofluorescence Staining**

|             | <b>Conjugate(s)</b> | <b>Source</b> | <b>Dilution</b> |
|-------------|---------------------|---------------|-----------------|
| Anti-rabbit | Alexa Fluor 488     | Invitrogen    | 1:200           |
| Anti-goat   | Alexa Fluor 594     | Invitrogen    | 1:600           |

**Table S4. Antibodies for Flow Cytometry:**

| <b>Antigen</b>                 | <b>Source</b>  | <b>Dilution</b> | <b>Clone</b> |
|--------------------------------|----------------|-----------------|--------------|
| Anti-human CXCR5 (APC)         | Biologend      | 1:50            | 356908       |
| Anti-human CD90 (PE-Cy7)       | BD biosciences | 1:50            | 561558       |
| Anti-human CD29 (APC)          | BD biosciences | 1:50            | 559883       |
| Anti-human CD34 (PE)           | BD biosciences | 1:50            | 550761       |
| Anti-human CD44 (APC)          | BD biosciences | 1:50            | 559942       |
| Anti-human CD45 (PE)           | BD biosciences | 1:50            | 560975       |
| Anti-human CD73 (PE)           | BD biosciences | 1:50            | 550257       |
| Anti-human CD90 (PE-Cy7)       | BD biosciences | 1:50            | 561558       |
| Anti-human CD105 (PerCP-Cy5.5) | BD biosciences | 1:50            | 560819       |
| Anti-human CD166 (PE)          | BD biosciences | 1:50            | 559263       |
| Anti-human CD3 (V450)          | BD biosciences | 1:50            | 561812       |
| Anti-human IFN- $\gamma$ (APC) | BD biosciences | 1:50            | 551385       |
| Anti-human TNF- $\alpha$ (PE)  | BD biosciences | 1:50            | 557647       |
| AnnexinV (APC)                 | BD biosciences | 1:20            | 550475       |
| propidium iodide (PI)          | BD biosciences | 1:50            | 556463       |
| Anti-mouse CD3 (PE-Cy7)        | BD biosciences | 1:100           | 561100       |
| Anti-mouse CD4 (PE)            | BD biosciences | 1:100           | 553653       |
| Anti-mouse CD8 (PB)            | BD biosciences | 1:100           | 558106       |
| Anti-mouse IFN- $\gamma$ (APC) | BD biosciences | 1:100           | 554413       |
| Anti-mouse IL-17 (AF700)       | Biologend      | 1:100           | 506914       |
